# Supplementary material for: Multiple time-scale variations of fronts in the Seto Inland Sea, Japan
Source: Copernicus journal article supplement (doi:10.5194/egusphere-2024-1667), 2024-06-24
Supplement: Supplementary file 1 [file egusphere-2024-1667-supplement.pdf]

# Multiple time-scale variations of fronts in the Seto Inland Sea, Japan

Menghong Dong<sup>1</sup>, Xinyu Guo<sup>2\*</sup>

<sup>1</sup>State Key Laboratory of Satellite Ocean Environment Dynamics, Second Institute of Oceanography, Ministry of Natural Resources, Hangzhou, 310012, China

<sup>2</sup>Center for Marine Environmental Studies, Ehime University, Matsuyama, 7908577, Japan

Correspondence to: Xinyu Guo (guo.xinyu.mz@ehime-u.ac.jp), Orcid ID: 0000-0002-4832-8625

## Contents of this file

10 Figures S1 and S2

## Introduction

This supporting information contains 2 supplementary figures (S1 and S2) to the manuscript.

15

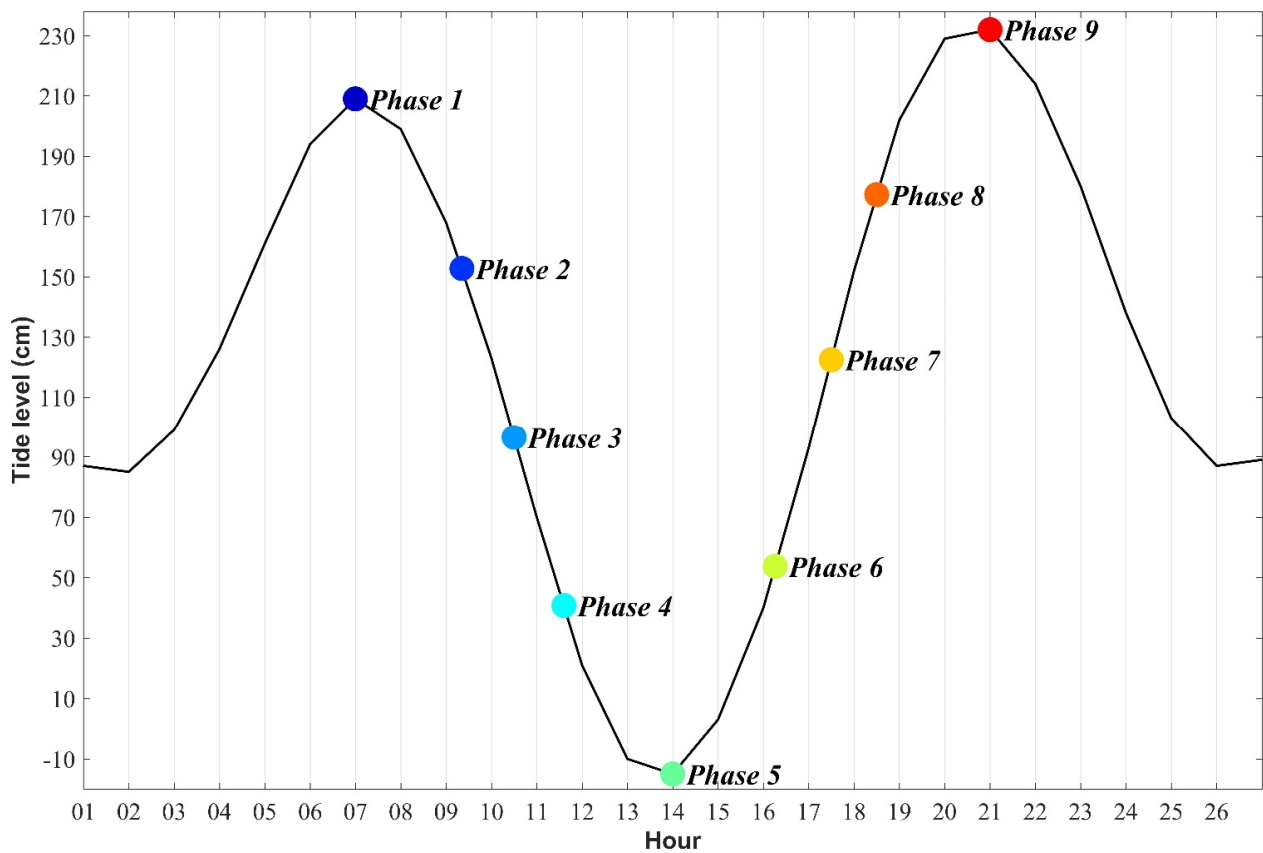

**Figure S1.** Tide level for 26 hours at G1 gauge data station. Nine phases, denoted as Indexes 1–9, were used to composite the SST data for the estimation of intra-tidal variations of the fronts.

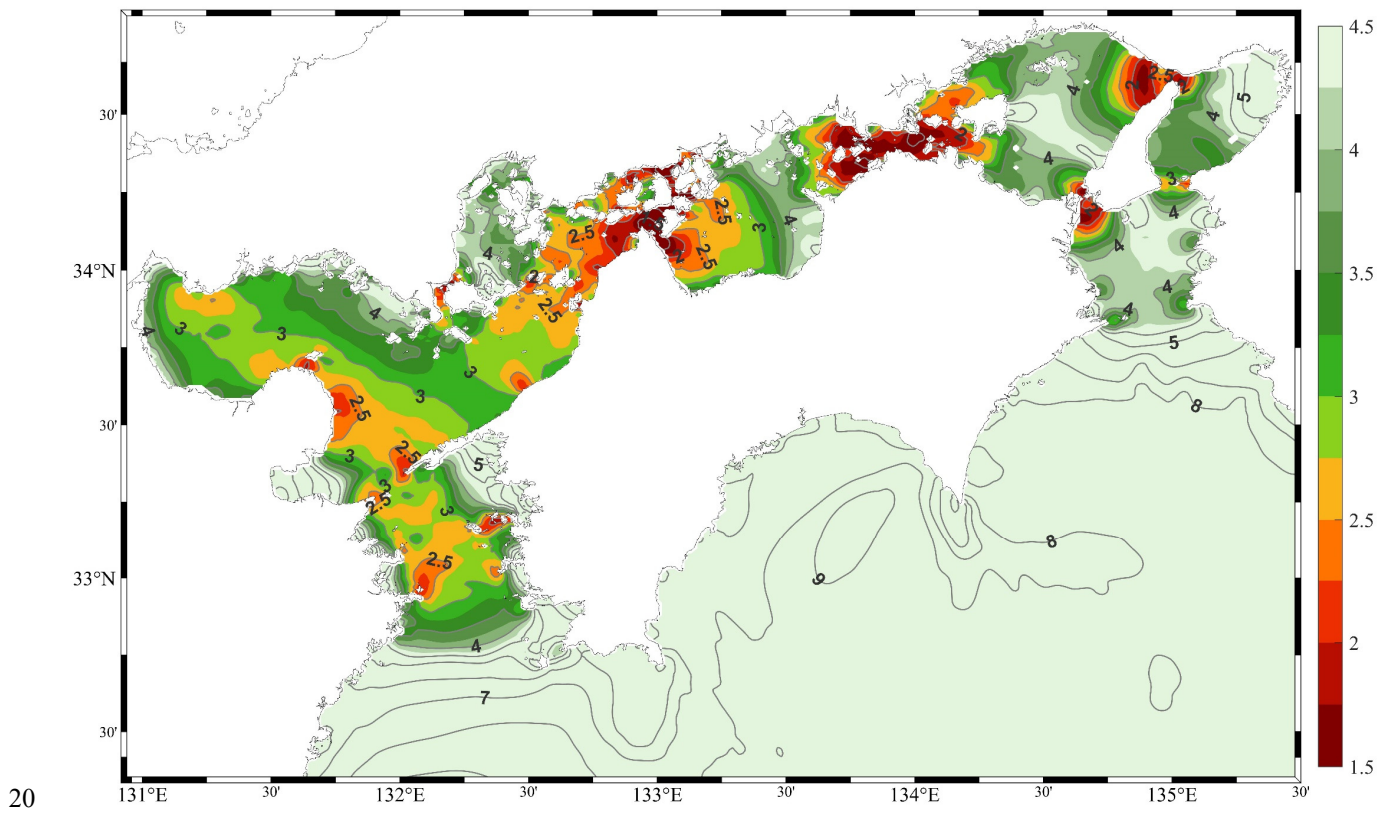

**Figure S2.** Distributions of  $\log_{10}(h/u^3)$  in the Seto Inland Sea.  $h$  is the water depth and  $u$  is the amplitude of the  $M_2$  tidal current.
